# Supplementary material for: Synthesis of catalytically active peroxidase-like Fe-doped carbon dots and application in ratiometric fluorescence detection of hydrogen peroxide and glucose
Source: Royal Society of Chemistry journal article supplement (doi:10.1039/c9ay00342h), 2019-01-01
Supplement: c9ay00342h1.pdf [file c9ay00342h1.pdf]

## Electronic Supplementary Information

### Synthesis of catalytically active peroxidase-like Fe-doped carbon dots and application for ratiometric fluorescence detection of hydrogen peroxide and glucose

Dan Zhu, Shujuan Zhuo\*, Changqing Zhu\*, Ping Zhang and Weili Shen

Key Laboratory of Functional Molecular Solids, Ministry of Education; Anhui Key Laboratory of Chemo-Biosensing, College of Chemistry and Materials Science, Anhui Normal University, Wuhu, 241000, PR China

\*Corresponding authors, E-mail addresses: sjzhuo@mail.ahnu.edu.cn (S. Zhuo), zhucq@mail.ahnu.edu.cn (C. Zhu).

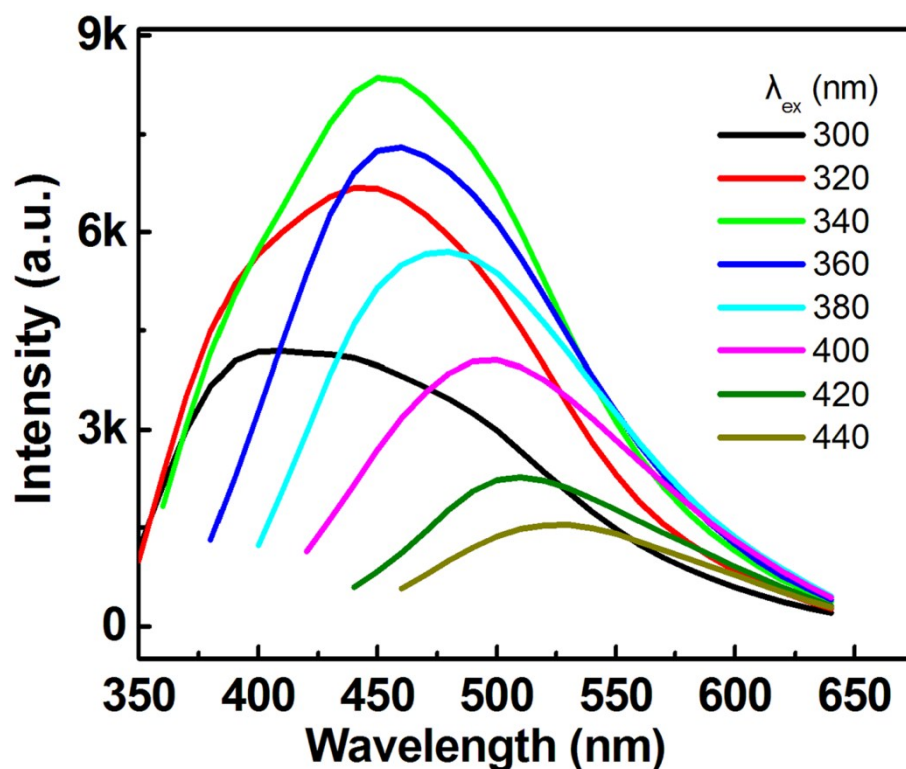

**Fig. S1** Fluorescence spectra of the Fe-CDs at different excitation wavelengths.

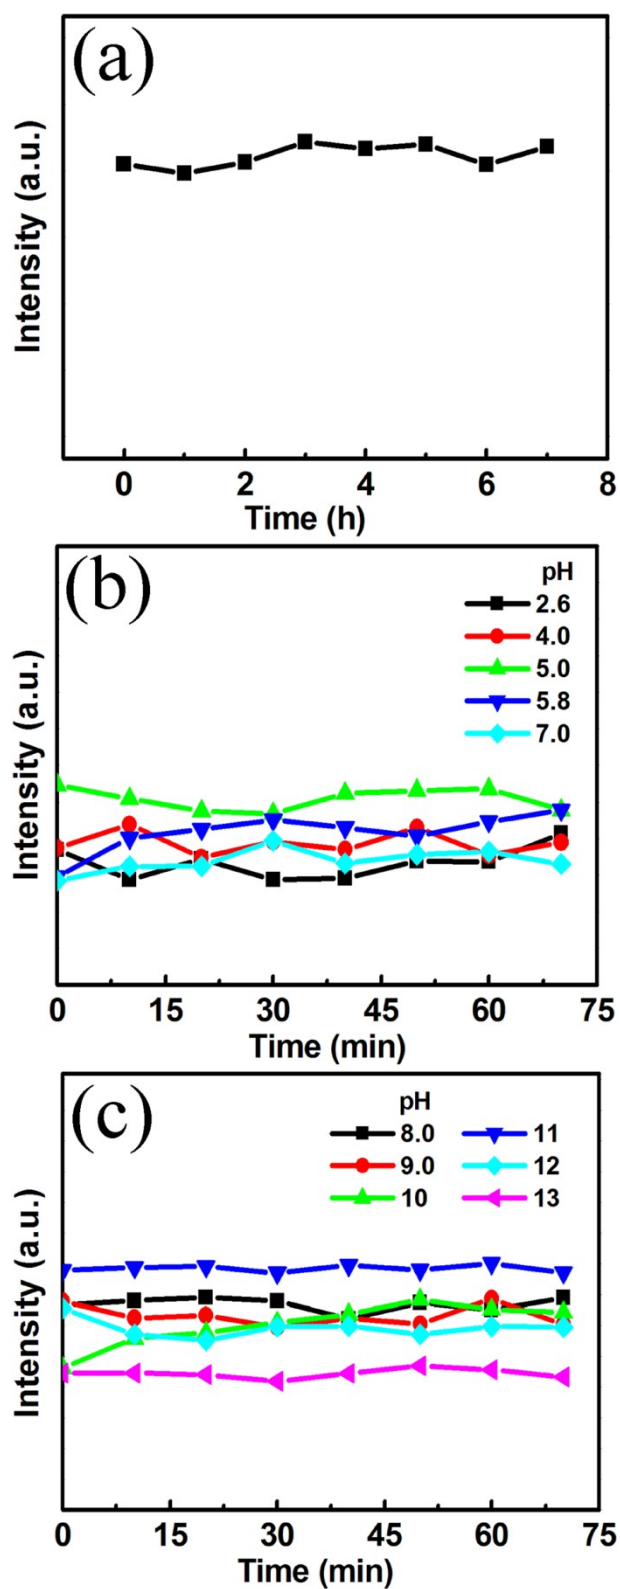

**Fig. S2** (a) Stability against photobleaching of Fe-CDs under xenon lamp. (b) and (c) Stability against photobleaching of Fe-CDs in various solutions with different pH at room temperature.

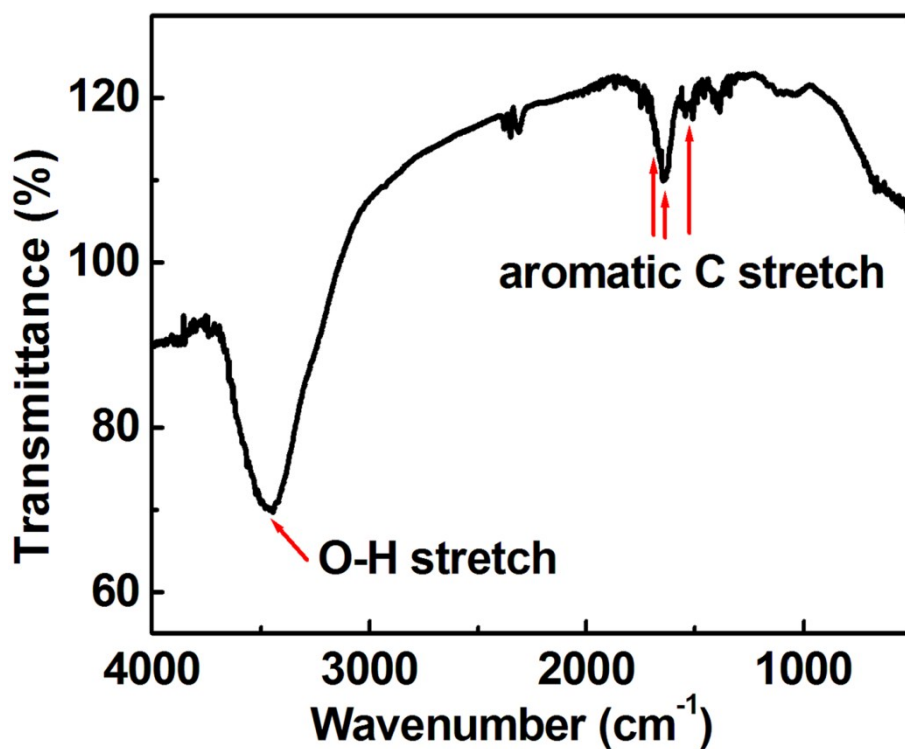

Fig. S3 FT-IR spectrum of the Fe-CDs.

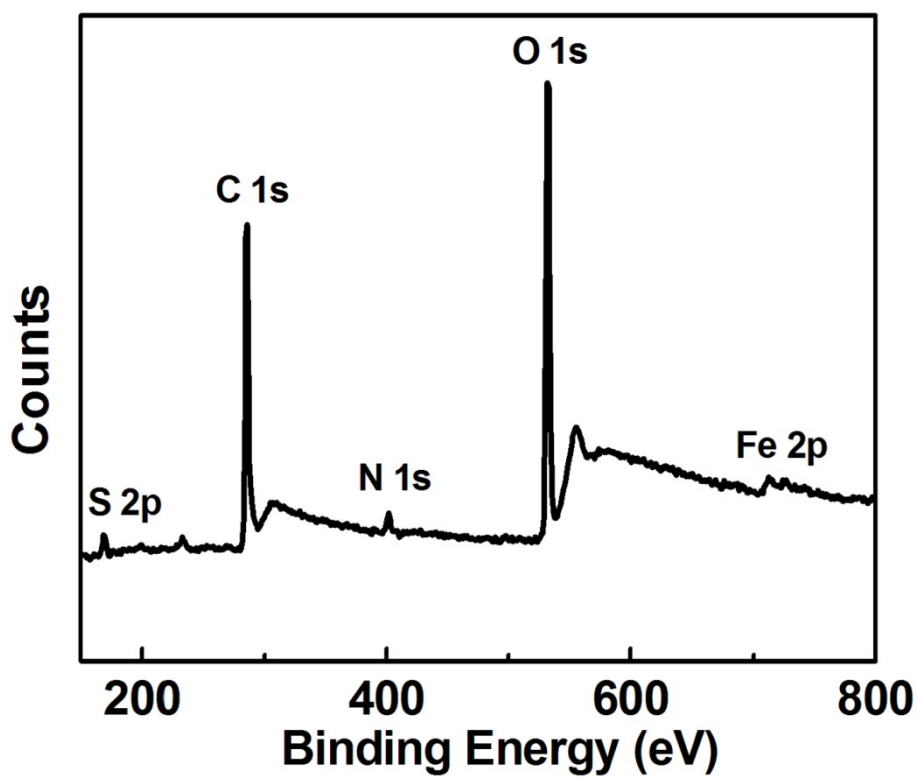

Fig. S4 Wide scan XPS full spectrum of Fe-CDs.

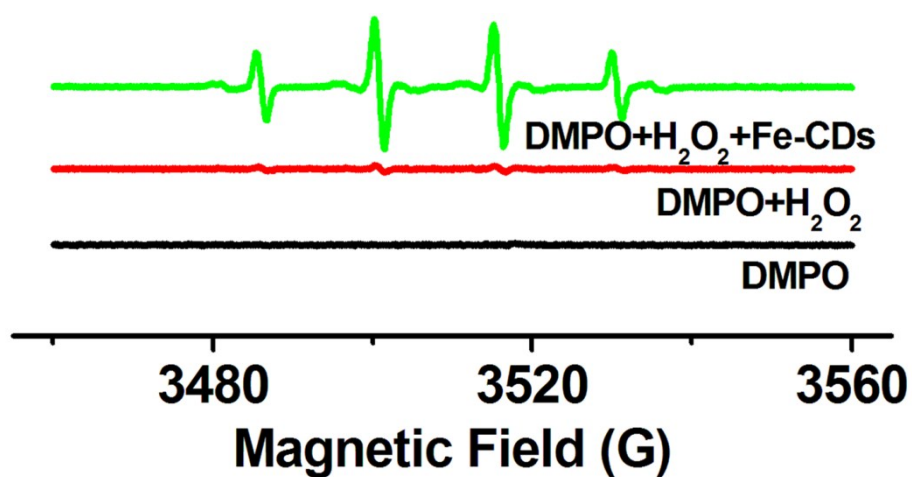

**Fig. S5** ESR spectra of DMPO, DMPO+H<sub>2</sub>O<sub>2</sub> and DMPO+H<sub>2</sub>O<sub>2</sub>+Fe-CDs system.

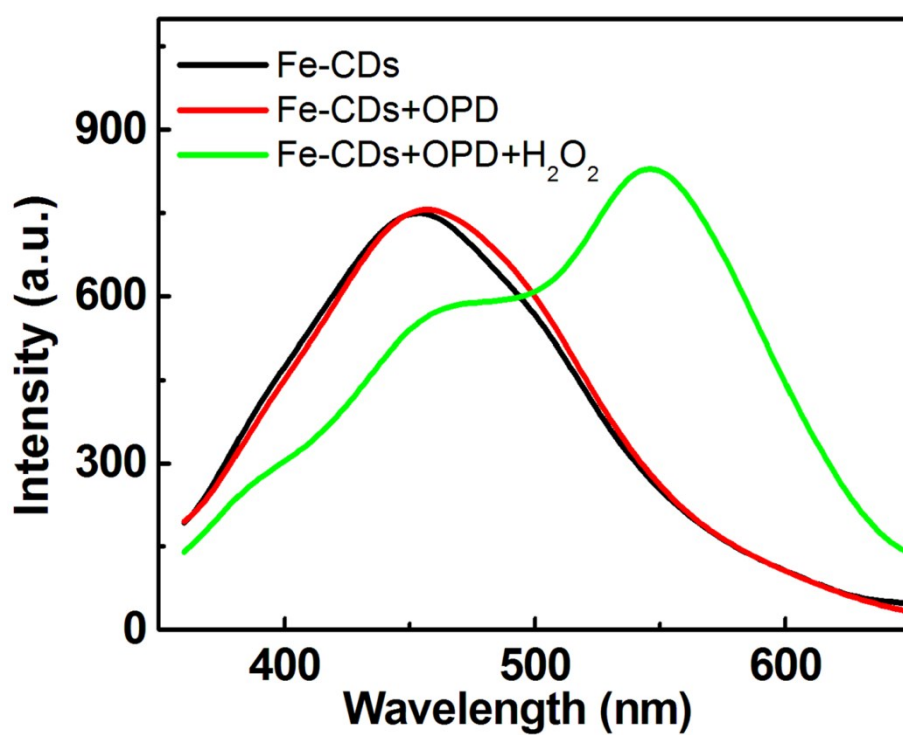

**Fig. S6** Fluorescence spectra of Fe-CDs, Fe-CDs+OPD and Fe-CDs+OPD+H<sub>2</sub>O<sub>2</sub> system.

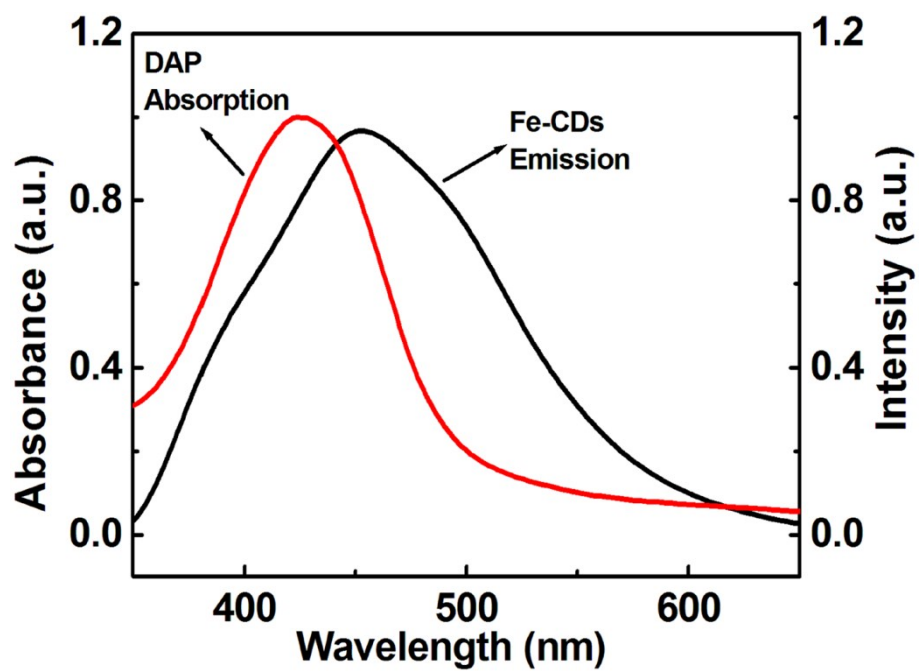

**Fig. S7** UV-vis absorption spectrum (red line) of DAP and fluorescence spectrum (black line) of Fe-CDs.

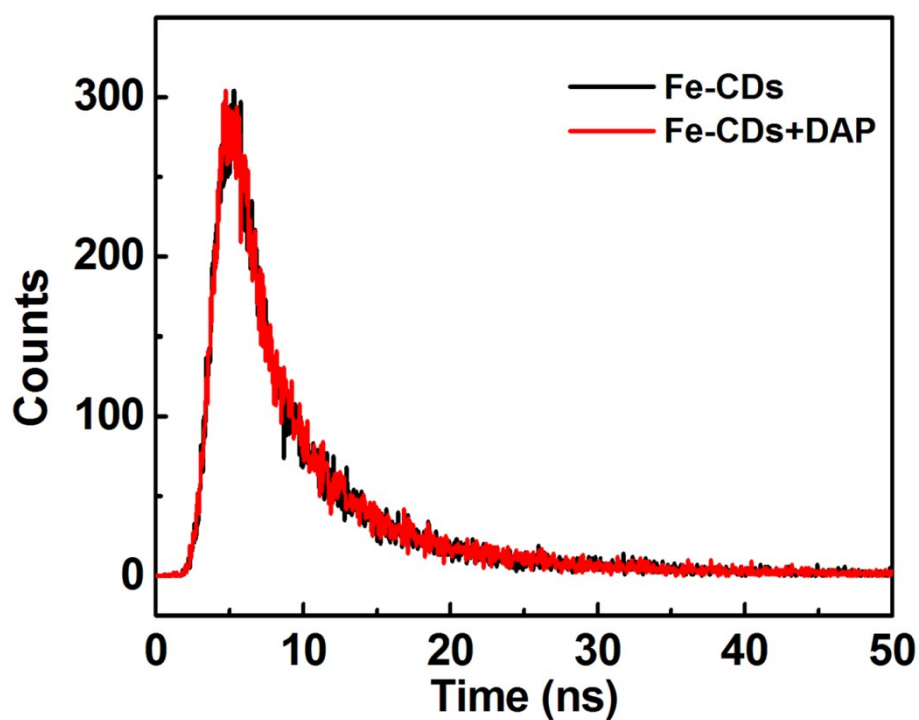

**Fig. S8** The fluorescence lifetimes of Fe-CDs (black line) and Fe-CDs+DAP (red line).

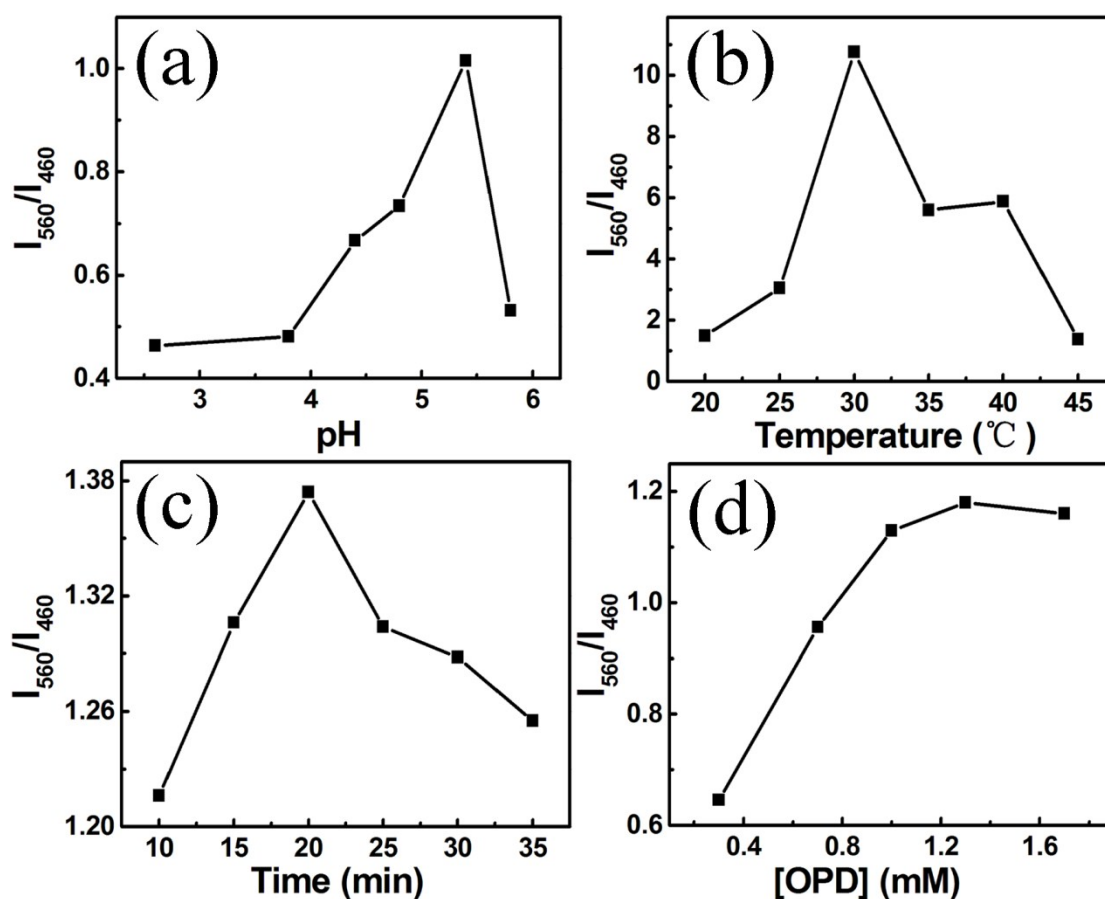

**Fig. S9** The effects of various reactive conditions on the determination of  $H_2O_2$ : (a) the pH of reactive solution, (b) the temperature of reactive solution, (c) the reactive time and (d) the concentration of OPD.

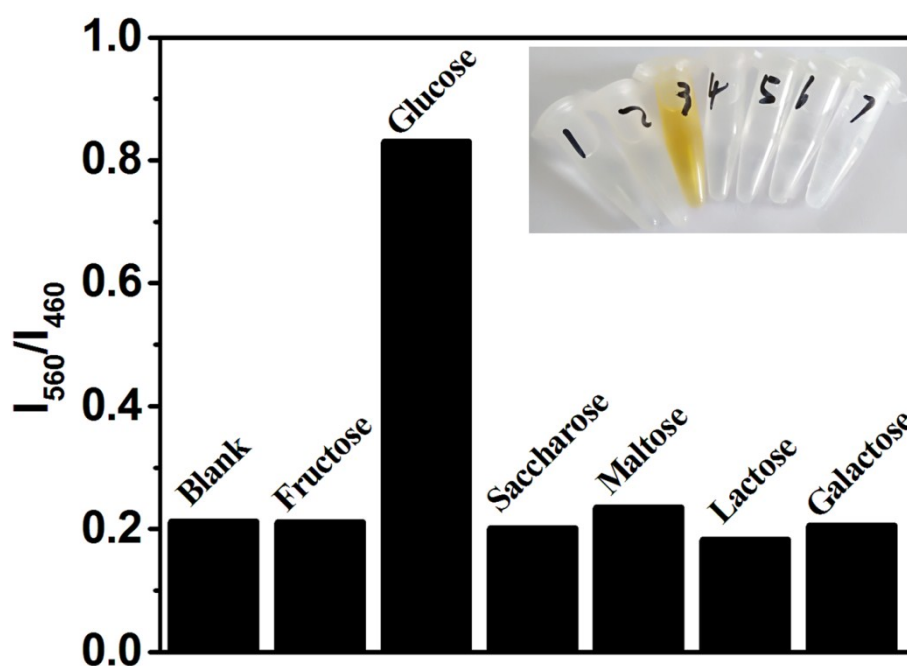

**Fig. S10** Selectivity of glucose detection, the concentrations of glucose and interferences were 0.017 mM. Inset: the corresponding photographs.

**Table S1** Comparison of the sensing performance of different catalysts for glucose detection.

| Catalyst                           | Linear range ( $\mu\text{M}$ ) | Detection limit ( $\mu\text{M}$ ) | Refs.     |
|------------------------------------|--------------------------------|-----------------------------------|-----------|
| ME-CDs                             | 200-2500                       | 60                                | 1         |
| Co <sub>3</sub> O <sub>4</sub> NPs | 10-10000                       | 5                                 | 2         |
| Graphene oxide                     | 1-20                           | 1                                 | 3         |
| Pt NCs                             | 0-200                          | 0.28                              | 4         |
| Fe-CDs                             | 0-300                          | 2.5                               | This work |

## References

- 1 B. Wang , F. Liu, Y. Y. Wu, Y. F. Chen, B. Weng and C. M. Li, *Sens. Actuator. B*, 2018, **255**, 2601–2607.
- 2 J. S. Mu, Y. Wang, M. Zhao and L. Zhang, *Chem. Commun.*, 2012, **48**, 2540–2542.
- 3 Y. J. Song, K. G. Qu, C. Zhao, J. S. Ren and X. G. Qu, *Adv. Mater.*, 2010, **22**, 2206–2210.
- 4 L. H. Jin, M. Zheng, Y. Q. Zhang, S. J. Cai, Z. H. Zhang, C. Li, L. Shang and Y. H. Shen, *ACS Appl. Mater. Interfaces*, 2017, **9**, 10027–10033.
